# Supplementary material for: Benchmarking PRS methods for risk prediction of 36 complex traits in UK Biobank by establishment of a large-scale PRS computation platform PRS-hub
Source: Research Square preprint supplement (doi:10.21203/rs.3.rs-6158628/v1), 2025-03-17
Supplement: Supplementary file 1 [file 93d4273205b51d40d0b03a2b.xlsx]

## Sheet: STable List
S1: External European GWAS summary statistics resources.
S2: External African GWAS summary statistics resources.
S3: Phenotype definitions.
S4: Best parameter performance of single-ancestry PRS methods in UK Biobank training dataset (diseases).
S5: Best parameter performance of single-ancestry PRS methods in UK Biobank testing dataset (diseases).
S6: Performance of best single-ancestry PRS methods for each trait in UK Biobank testing dataset (disease).
S7: Performance of Ensemble method combining single-ancestry PRS methods in UK Biobank testing dataset (disease).
S8: Best parameter performance of single-ancestry PRS methods in UK Biobank training dataset (quantitative traits).
S9: Best parameter performance of single-ancestry PRS methods in UK Biobank testing dataset (quantitative traits).
S10: Performance of best single-ancestry PRS methods for each trait in UK Biobank testing dataset (quantitative traits).
S11: Performance of Ensemble method combining single-ancestry PRS methods in UK Biobank testing dataset (quantitative traits).
S12: Comparision of risk stratification capacity in single-ancestry and Ensemble PRS methods for each disease.
S13: Generating time of different sample size of LD references.
S14: Predictive performance from different LD sample sizes in disease.
S15: Predictive performance from different LD sample sizes in quantitative traits.
S16: Best parameter performance of multi-ancestry PRS methods in UK Biobank (disease).
S17: Best parameter performance of multi-ancestry PRS methods in UK Biobank (quantitative trait).
S18: Computational cost of 10 PRS methods.
S19: Average computational effciency of 10 PRS methods.

## Sheet: S1 External European GWAS
Trait	Abbreviation	Disease/QT	Ancestry	% European	Discovery sample description	UK Biobank overlap	GWAS Source	First author	Publication date	Journal	PMID	Paper URL
Asthma	Asthma	Disease	European, African, East Asian, South Asian, Admixed American	0.75	120,763 cases and 1,248,609 controls	No	Global Biobank Meta-analysis Initiative	Wei Zhou	2022-10-12	Cell Genom	36777996	https://pubmed.ncbi.nlm.nih.gov/36777996/
Bipolar disorder	BP	Disease	European	1	9,784 cases and 30,471 controls	No	GWAS Catalog: GCST003724	Liping Hou	2016-06-21	Hum Mol Genet	27329760	https://pubmed.ncbi.nlm.nih.gov/27329760/
Breast cancer	BCa	Disease	European	1	76,192 cases and 63,082 controls	No	GWAS Catalog: GCST004988	Michailidou K	2017-10-23	Nature	29059683	https://pubmed.ncbi.nlm.nih.gov/29059683/
Chronic obstructive pulmonary disease	COPD	Disease	European, African, East Asian, South Asian, Admixed American	0.75	67,146 cases and 925,143 controls	No	Global Biobank Meta-analysis Initiative	Wei Zhou	2022-10-12	Cell Genom	36777996	https://pubmed.ncbi.nlm.nih.gov/36777996/
Coronary artery disease	CAD	Disease	European	1	215626 cases and 890,602 controls	No	Genes & Health, FinnGen, Million Veteran Program, and CARDIOGRAMplusC4D	Aniruddh P Patel, Minxian Wang	2023-07-06	Nat Med	37414900	https://pubmed.ncbi.nlm.nih.gov/37414900/
Crohn's disease	CD	Disease	European	1	12,160 cases and 13,145 controls	No	GWAS Catalog: GCST004132	Katrina M de Lange	2017-01-09	Nature Genet	28067908	https://pubmed.ncbi.nlm.nih.gov/28067908/
Gout	Gout	Disease	European, African, East Asian, South Asian, Admixed American	0.75	60,605 cases and 859,141 controls	No	Global Biobank Meta-analysis Initiative	Wei Zhou	2022-10-12	Cell Genom	36777996	https://pubmed.ncbi.nlm.nih.gov/36777996/
Heart failure	HF	Disease	European, African, East Asian, South Asian, Admixed American	0.75	68,408 cases and 1,286,331 controls	No	Global Biobank Meta-analysis Initiative	Wei Zhou	2022-10-12	Cell Genom	36777996	https://pubmed.ncbi.nlm.nih.gov/36777996/
Lung cancer	LCa	Disease	European	1	29,266 cases, 56,450 controls	No	dbGaP: phs000876.v1.p1	James D McKay	2017-06-12	Nature Genet	28604730	https://pubmed.ncbi.nlm.nih.gov/28604730/
Parkinson's disease	PD	Disease	European	1	13,196 cases and 148,176 controls	No	The International Parkinson Disease Genomics Consortium (IPDGC)	Karl Heilbron	2019-03-27	NPJ Parkinsons Dis	30937360	https://pubmed.ncbi.nlm.nih.gov/30937360/
Primary open angle glaucoma	POAG	Disease	European	0.75	26,848 cases and 1,460,599 controls	No	Global Biobank Meta-analysis Initiative	Wei Zhou	2022-10-12	Cell Genom	36777996	https://pubmed.ncbi.nlm.nih.gov/36777996/
Prostate cancer	PCa	Disease	European	1	79,148 cases, 61,106 controls	No	GWAS Catalog: GCST006085	Schumacher FR	2018-06-11	Nat Genet	29892016	https://pubmed.ncbi.nlm.nih.gov/29892016/
Psoriasis	PsO	Disease	European, South Asia	0.838	15,967 European ancestry cases, 28,194 European ancestry controls, 2,590 South Asian ancestry cases, 1,720 South Asian ancestry controls	No	GWAS Catalog: GCST90019017	Stuart PE	2021-11-06	HGG Adv	34927100	https://pubmed.ncbi.nlm.nih.gov/34927100/
Rheumatoid arthritis	RA	Disease	European	1	5,539 cases, 20,169 controls	No	GWAS Catalog: GCST000679	Stahl EA	2010-05-09	Nat Genet	20453842	https://pubmed.ncbi.nlm.nih.gov/20453842/
Schizophrenia	SCZ	Disease	European, East Asian, African American, Latino	0.743	total 74,776 cases, 101,023 controls	No	Psychiatric Genomics Consortium (PGC)	Vassily Trubetskoy, Antonio F Pardiñas	2022-04-08	Nature	35396580	https://pubmed.ncbi.nlm.nih.gov/35396580/
Stroke	Stroke	Disease	European, African, East Asian, South Asian, Admixed American	0.75	58,218 cases and 903,092 controls	No	Global Biobank Meta-analysis Initiative	Wei Zhou	2022-10-12	Cell Genom	36777996	https://pubmed.ncbi.nlm.nih.gov/36777996/
Systemic lupus erythematosus	SLE	Disease	European	1	4,943 cases, 8,483 controls	No	GWAS Catalog: GCST005831	Julià A	2018-05-30	Arthritis Res Ther	29848360	https://pubmed.ncbi.nlm.nih.gov/29848360/
Type 2 diabetes	T2D	Disease	European	1	26,676 cases, 132,532 controls	No	GWAS Catalog: GCST004773	Scott RA	2017-05-31	Diabetes	28566273	https://pubmed.ncbi.nlm.nih.gov/28566273/
Venous thromboembolism	VTE	Disease	European, African, East Asian, South Asian, Admixed American	0.75	total 20,054 cases, 608,207 controls	No	Global Biobank Meta-analysis Initiative	Wei Zhou	2022-10-12	Cell Genom	36777996	https://pubmed.ncbi.nlm.nih.gov/36777996/
Apolipoprotein A1	ApoA1	QT	European	1	20,687 individuals	No	GWAS Catalog: GCST90132700	Kettunen J	2016-03-23	Nat Commun	27005778	https://pubmed.ncbi.nlm.nih.gov/27005778/
Apolipoprotein B	ApoB	QT	European	1	20,690 individuals	No	GWAS Catalog: GCST90132701	Kettunen J	2016-03-24	Nat Commun	27005778	https://pubmed.ncbi.nlm.nih.gov/27005778/
Body mass index (BMI)	BMI	QT	European	1	~1.1 million European	No	dbGaP: phs001672	Jie Huang	2022-12-29	Nat Commun	36581621	https://pubmed.ncbi.nlm.nih.gov/36581621/
Calcium	Ca	QT	European	1	66732 European	No	GWAS Catalog: GCST90012622	Dennis JK	2021-01-13	Genome Med	33441150	https://pubmed.ncbi.nlm.nih.gov/33441150/
Docosahexaenoic acid	DHA	QT	European	1	13,499 individuals	No	GWAS Catalog: GCST90132694	Kettunen J	2016-03-24	Nat Commun	27005778	https://pubmed.ncbi.nlm.nih.gov/27005778/
Estimated glomerular filtration rate (creatinine based)	eGFR	QT	European	1	24,810 individuals	No	GWAS Catalog: GCST90132719	Kettunen J	2016-03-23	Nat Commun	27005778	https://pubmed.ncbi.nlm.nih.gov/27005778/
Glycated hemoglobin (HbA1c)	HbA1c	QT	European	1	146,806 individuals	No	GWAS Catalog: GCST90002244	Chen J	2021-05-31	Nat Genet	34059833	https://pubmed.ncbi.nlm.nih.gov/34059833/
High-density lipoprotein (HDL)	HDL	QT	European	1	1,320,016 individuals	No	Global Lipids Genetics Consortium	Sarah E Graham	2021-12-09	Nature	34887591	https://pubmed.ncbi.nlm.nih.gov/34887591/
Height	HT	QT	European	1	183,727 European	No	GWAS Catalog: GCST000817	Hana Lango Allen	2010-10-14	Nature	20881960	https://pubmed.ncbi.nlm.nih.gov/20881960/
Low-density lipoprotein (LDL)	LDL	QT	European	1	1,320,016 individuals	No	Global Lipids Genetics Consortium	Sarah E Graham	2021-12-09	Nature	34887591	https://pubmed.ncbi.nlm.nih.gov/34887591/
nonHDL	RC	QT	European	1	1,320,016 individuals	No	Global Lipids Genetics Consortium	Sarah E Graham	2021-12-09	Nature	34887591	https://pubmed.ncbi.nlm.nih.gov/34887591/
Omega-3 fatty acids	n-3	QT	European	1	13,544 individuals	No	GWAS Catalog: GCST90132736	Kettunen J	2016-03-23	Nat Commun	27005778	https://pubmed.ncbi.nlm.nih.gov/27005778/
Omega-6 fatty acids	n-6	QT	European	1	13,506 individuals	No	GWAS Catalog: GCST90132737	Kettunen J	2016-03-23	Nat Commun	27005778	https://pubmed.ncbi.nlm.nih.gov/27005778/
Phosphoglycerides	PG	QT	European	1	13,519 individuals	No	GWAS Catalog: GCST90132742	Kettunen J	2016-03-23	Nat Commun	27005778	https://pubmed.ncbi.nlm.nih.gov/27005778/
Sphingomyelins	SM	QT	European	1	13,476 individuals	No	GWAS Catalog: GCST90132747	Kettunen J	2016-03-23	Nat Commun	27005778	https://pubmed.ncbi.nlm.nih.gov/27005778/
Total cholesterol	TC	QT	European	1	1,320,016 individuals	No	Global Lipids Genetics Consortium	Sarah E Graham	2021-12-09	Nature	34887591	https://pubmed.ncbi.nlm.nih.gov/34887591/
Triglycerides	TG	QT	European	1	1,320,016 individuals	No	Global Lipids Genetics Consortium	Sarah E Graham	2021-12-09	Nature	34887591	https://pubmed.ncbi.nlm.nih.gov/34887591/

## Sheet: S2 External Afrian GWAS
Trait	Disease/QT	Abbreviation	Ancestry	% Afrian	Discovery sample description	UK Biobank overlap	GWAS Source	First author	Publication date	Journal	PMID	Paper URL
Asthma	Disesase	Asthma	African	1	8,618 cases and 5,553 controls	No	GWAS Catalog: GCST90131435	Xiao Chang	2033/4/5	J Allergy Clin Immunol	36089080	https://pubmed.ncbi.nlm.nih.gov/36089080/
Coronary artery disease	Disesase	CAD	African	1	17,202 cases and 59,507 controls	No	dbGaP: phs001672.v11.p1	Catherine Tcheandjieu	2022-08-01	Nat Med	35915156	https://pubmed.ncbi.nlm.nih.gov/35915156/
Type 2 diabetes	Disesase	T2D	African	1	23,305 cases and 30,140 controls	No	dbGaP: phs001672.v11.p1	Marijana Vujkovic	2020-06-15	Nat Genet	32541925	https://pubmed.ncbi.nlm.nih.gov/32541925/
Body mass index	QT	BMI	African	1	14,126 individuals	No	GWAS Catalog: GCST009057	Deepti Gurdasani	2019-10-31	Cell	31675503	https://pubmed.ncbi.nlm.nih.gov/31675503/
Glycated hemoglobin HbA1c	QT	HbA1c	African	1	6,647 individuals	No	GWAS Catalog: GCST90002242	Ji Chen	2021-05-31	Nat Genet	34059833	https://pubmed.ncbi.nlm.nih.gov/34059833/
High-density lipoprotein cholesterol	QT	HDL	African	1	24,616 individuals	No	GWAS Catalog: GCST90101746	Ananyo Choudhury	2022-05-11	Nat Commun	35546142	https://pubmed.ncbi.nlm.nih.gov/35546142/

## Sheet: S3 Phenotype definitions
Trait	Disease/QT	ICD-10 / OPCS-4 code	UK Biobank field	Other requirements for UK Biobank	ICD-10 classification
Asthma	Disease	J45,J45.0,J45.1,J45.8,J45.9,J46	41202, 41204, 40001, 40002	UK Biobank code 1111 in field 20002; UK Biobank code 8 in field 6152; UK Biobank code 493,4930,4931,4939,49399 in field 41203 and 41205.	Respiratory
Bipolar disorder	Disease	F31,F31.0,F31.1,F31.2,F31.3,F31.4,F31.5,F31.6,F31.7,F31.8,F31.9	41202, 41204, 40001, 40002	UK Biobank code 1291 in field 20002.	Mental disorders
Breast cancer	Disease	C50,C50.0,C50.1,C50.2,C50.3,C50.4,C50.5,C50.6,C50.8,C50.9	41202, 41204, 40001, 40002	UK Biobank code 1002 in field 20001; UK Biobank code 174,1749 in field 41203 and 41205. Female only.	Neoplasms
Chronic obstructive pulmonary disease	Disease	J41,J41.0,J42,J43,J43.0,J43.1,J43.2,J43.8,J43.9,J44,J44.0,J44.1,J44.8,J44.9	41202, 41204, 40001, 40002	UK Biobank code 1112,1113,1472 in field 20002; UK Biobank code 6 in field 6152; UK Biobank code 491,4912,4919,492,4929,496,4969 in field 41203 and 41205.	Respiratory
Coronary artery disease	Disease	K40.1,K40.2,K40.3,K40.4,K41.1,K41.2,K41.3,K41.4,K45.1,K45.2,K45.3,K45.4,K45.5,K49.1,K49.2,K49.8,K49.9,K50.2,K75.1,K75.2,K75.3,K75.4,K75.8,K75.9	41200, 41210	UK Biobank code 0,1,2 in field 42001.	Circulatory system
Crohn's disease	Disease	K50, M07.4, M09.1	41202, 41204, 40001, 40002	UK Biobank code 555,5550,5551,5552,5559 in field 41203 and 41205.	Digestive
Gout	Disease	M10.0,M10.00,M10.01,M10.02,M10.04,M10.06,M10.07,M10.08,M10.09,M10.2,M10.25,M10.29,M10.3,M10.37,M10.39,M10.4,M10.40,M10.46,M10.49,M10.9,M10.90,M10.91,M10.92,M10.93,M10.94,M10.95,M10.96,M10.97,M10.98,M10.99	41202, 41204, 40001, 40002	UK Biobank code 1466 in field 20002; UK Biobank code 274,2740,2741,2748,2749 in field 41203 and 41205.	Endocrine/metabolic
Heart failure	Disease	I11.0,I13.0,I13.2,I25.5,I42.0,I42.5,I42.8,I42.9,I50,I50.0	41202, 41204, 40001, 40002	UK Biobank code 1076,1079 in field 20002; exclude UK Biobank code 1588 in field 20002 and I42.1,I42.2 in field 41202, 41204, 40001 and 40002.	Circulatory system
Lung cancer	Disease	C34,C34.0,C34.1,C34.2,C34.3,C34.8,C34.9	41202, 41204, 40001, 40002	UK Biobank code 1001,1027,1028 in field 20001; UK Biobank code 1629 in field 41203 and 41205.	Neoplasms
Parkinson's disease	Disease	G20,F02.3	41202, 41204, 40001, 40002	UK Biobank code 1262 in field 20002; UK Biobank code 3320 in field 41203 and 41205.	Neurological
Primary open angle glaucoma	Disease	H40.1, H40.9	41270, 41280, 41202, 41262, 41204, 41201, 40001, 40002	UK Biobank code 1277 in field 20002.	Eye and accessory organ diseases
Prostate cancer	Disease	C61	41202, 41204, 40001, 40002	UK Biobank code 1044 in field 20001. Male only	Neoplasms
Psoriasis	Disease	L40,L40.0,L40.1,L40.3,L40.4,L40.5,L40.8,L40.9,M07.0,M07.00,M07.01,M07.03,M07.04,M07.07,M07.09,M07.1,M07.19,M07.2,M07.26,M07.28,M07.29,M07.3,M07.30,M07.31,M07.32,M07.33,M07.34,M07.35,M07.36,M07.37,M07.38,M07.39	41202, 41204, 40001, 40002	UK Biobank code 1453 in field 20002; UK Biobank code 6960,961 in field 41203 and 41205.	Dermatologic
Rheumatoid arthritis	Disease	M05,M05.0,M05.00,M05.09,M05.1,M05.10,M05.18,M05.19,M05.2,M05.20,M05.24,M05.28,M05.29,M05.3,M05.30,M05.38,M05.39,M05.8,M05.80,M05.84,M05.89,M05.9,M05.90,M05.91,M05.92,M05.93,M05.94,M05.95,M05.96,M05.9,M05.98,M05.99,M06,M06.0,M06.00,M06.01,M06.02,M06.03,M06.04,M06.0M06.06,M06.07,M06.09,M06.1,M06.10,M06.19,M06.2,M06.3,M06.30,M06.32,M06.33,M06.34,M06.36,M06.37,M06.4,M06.40,M06.41,M06.43,M06.45,M06.46…	41202, 41204, 40001, 40002	UK Biobank code 1464 in field 20002; UK Biobank code 714,7140,71400,71403,71406,71409,7149,71499 in field 41203 and 41205.	Musculoskeletal
Schizophrenia	Disease	F20,F20.0,F20.2,F20.4,F20.5,F20.6,F20.8,F20.9	41202, 41204, 40001, 40002	UK Biobank code 1289 in field 20002	Mental disorders
Stroke	Disease		41007	UK Biobank code 0,1,2 in field 42007	Circulatory system
Systemic lupus erythematosus	Disease	M32.0,M32.1,M32.8	41270, 41280, 41202, 41262, 41204, 41201, 40001, 40002		Hematopoietic
Type 2 diabetes	Disease	E11,E11.0,E11.1,E11.2,E11.3,E11.4,E11.5,E11.6,E11.7,E11.8,E11.9	41202, 41204, 40001, 40002	UK Biobank code 1223 in field 20002.	Endocrine/metabolic
Venous thromboembolic disease	Disease	I26,I26.0,I26.9,I80.1,I80.2,I82.2L79.1,L90.2,L79.1,L90.2	41202, 41204, 40001, 40002, 41200, 41210	UK Biobank code 1068,1093,1094 in field 20002; UK Biobank code 5,7 in field 6152; exclude UK Biobank code I80.0,I80.3,I80.8,I80.9,I81,I82.0,D68,D68.0,D68.1,D68.2,D68.3,D68.4,D68.5,D68.6,D68.8,D68.9 in field 41202, 41204, 40001, 40002.	Circulatory system
Apolipoprotein A1	QT		30630		Circulatory system
Apolipoprotein B	QT		30640		Circulatory system
Body mass index	QT		21001		Endocrine/metabolic
Calcium	QT		30680		Endocrine/metabolic
Docosahexaenoic acid	QT		23450		circulatory system
Estimated glomerular filtration rate (creatinine based)	QT		30700		genitourinary
Glycated hemoglobin (HbA1c)	QT		30750		endocrine/metabolic
High-density lipoprotein cholesterol (HDL)	QT		30760	Fibrate and Niacin medications were up-adjusted by 10% and 15%, respectively. Reference: Birjmohun RS et al. JACC 2005;45:185-97.	circulatory system
Height	QT		50		Endocrine/metabolic
Low density lipoprotein cholesterol (LDL)	QT		30780	Stain medication was down-adjusted by 30%. Reference: Cholesterol Treatment Trialists' (CTT) Collaboration et al. Lancet. 2010 Nov 13;376(9753); Ezetimibe medication was down-adjusted by 20%. References: Sudhop T et al. Circulation 2002;106:1943-1948; Cannon CP et al. NEJM 2015;372:2387-97; Zhao Z et al. Medicine (Baltimore). 2019 Feb;98(6);Bile acid sequestrant medication was down-adjusted by 15…	Circulatory system
Remnant cholesterol	QT		23402		Circulatory system
Omega-3 fatty acids	QT		23444		Circulatory system
Omega-6 fatty acids	QT		23445		Circulatory system
Phosphoglycerides	QT		23434		Neurological
Sphingomyelins	QT		23438		Neurological
Total cholesterol	QT		23400	Stain medication was down-adjusted by 20%. Reference: Cholesterol Treatment Trialists' (CTT) Collaboration et al. Lancet. 2010 Nov 13;376(9753); Ezetimibe medication was down-adjusted by 15%. References: Sudhop T et al. Circulation 2002;106:1943-1948; Cannon CP et al. NEJM 2015;372:2387-97; Zhao Z et al. Medicine (Baltimore). 2019 Feb;98(6); Fibrate and Niacin medications were down-adjusted by 10…	Circulatory system
Triglycerides	QT		23407	Stain medication was down-adjusted by 15%. Reference: Cholesterol Treatment Trialists' (CTT) Collaboration et al. Lancet. 2010 Nov 13;376(9753); Fibrate and Niacin medications were down-adjusted by 35% and 20%, respectively. Reference: Birjmohun RS et al. JACC 2005;45:185-97; Not specified assumed statins medications were down-adjusted 30%.	Circulatory system

## Sheet: S4 Disease performance training
Methods	Parameter	Disease	AUC	Odds Ratio
P+T	X0.05p 0.6r2	Asthma	0.618204	1.49672
P+T	X1p 0.8r2	Bipolar disorder	0.617977	1.49562
P+T	X0.0005p 0.4r2	Breast cancer	0.819378	1.60442
P+T	X0.05p 0.6r2	Coronary artery disease	0.815581	1.76337
P+T	X0.5p 0.8r2	Chronic obstructive pulmonary disease	0.703929	1.33245
P+T	X0.05p 0.4r2	Crohn's disease	0.642438	1.70739
P+T	X0.05p 0.8r2	Gout	0.79613	1.65633
P+T	X0.5p 0.8r2	Heart failure	0.731603	1.25373
P+T	X0.5p 0.6r2	Lung cancer	0.713922	1.24139
P+T	X0.05p 0.8r2	Parkinsons disease	0.755774	1.34831
P+T	X0.05p 0.8r2	Primary open angle glaucoma	0.726226	1.58987
P+T	X0.0005p 0.2r2	Prostate cancer	0.885586	1.76851
P+T	X0.05p 0.4r2	Psoriasis	0.685999	1.71182
P+T	X0.05p 0.4r2	Rheumatoid arthritis	0.648525	1.2995
P+T	X0.5p 0.4r2	Schizophrenia	0.711755	2.07035
P+T	X1p 0.2r2	Stroke	0.676219	1.21134
P+T	X0.00000005p 0.4r2	Systemic lupus erythematosus	0.723517	1.51318
P+T	X0.05p 0.8r2	Type 2 diabetes	0.687693	1.4764
P+T	X0.00000005p 0.2r2	Venous thromboembolism	0.63875	1.36775
LDpred2	p.0.032 h2.0.7 F	Asthma	0.63344	1.59266
LDpred2	p.0.018 h2.1 F	Bipolar disorder	0.637758	1.60423
LDpred2	p.0.018 h2.0.7 T	Breast cancer	0.830829	1.79441
LDpred2	p.0.018 h2.0.7 F	Coronary artery disease	0.825478	1.99606
LDpred2	p.0.056 h2.1.4 F	Chronic obstructive pulmonary disease	0.70664	1.37399
LDpred2	p.0.01 h2.0.7 T	Crohn's disease	0.691333	2.06921
LDpred2	p.0.032 h2.0.7 T	Gout	0.807859	1.85002
LDpred2	p.0.018 h2.0.7 F	Heart failure	0.733055	1.28192
LDpred2	p.0.0056 h2.0.7 F	Lung cancer	0.720092	1.33406
LDpred2	p.0.0056 h2.0.7 T	Parkinsons disease	0.762669	1.45164
LDpred2	p.0.0056 h2.0.7 F	Primary open angle glaucoma	0.74049	1.77071
LDpred2	p.0.018 h2.0.7 T	Prostate cancer	0.897985	2.09867
LDpred2	p.0.056 h2.0.7 T	Psoriasis	0.703646	1.84962
LDpred2	p.0.1 h2.0.7 T	Rheumatoid arthritis	0.653775	1.35693
LDpred2	p.0.056 h2.0.7 F	Schizophrenia	0.73747	2.23439
LDpred2	p.0.018 h2.1.4 F	Stroke	0.678023	1.24831
LDpred2	p.0.32 h2.0.7 F	Systemic lupus erythematosus	0.725004	1.87756
LDpred2	p.0.01 h2.0.7 F	Type 2 diabetes	0.704772	1.65494
LDpred2	p.0.0056 h2.1 F	Venous thromboembolism	0.653196	1.48638
Lassosum2	s.0.01 nl.4	Asthma	0.62752	1.55464
Lassosum2	s.0.001 nl.4	Bipolar disorder	0.618686	1.49907
Lassosum2	s.0.1 nl.5	Breast cancer	0.829286	1.76701
Lassosum2	s.1 nl.5	Coronary artery disease	0.822072	1.92564
Lassosum2	s.0.01 nl.4	Chronic obstructive pulmonary disease	0.702694	1.32056
Lassosum2	s.0.01 nl.4	Crohn's disease	0.684336	2.00662
Lassosum2	s.0.001 nl.5	Gout	0.803399	1.78163
Lassosum2	s.0.1 nl.4	Heart failure	0.72943	1.20451
Lassosum2	s.0.01 nl.4	Lung cancer	0.716618	1.28341
Lassosum2	s.1 nl.3	Parkinsons disease	0.757123	1.36584
Lassosum2	s.0.01 nl.3	Primary open angle glaucoma	0.733514	1.68745
Lassosum2	s.0.001 nl.4	Prostate cancer	0.896805	2.05723
Lassosum2	s.1 nl.5	Psoriasis	0.690094	1.76208
Lassosum2	s.1 nl.10	Rheumatoid arthritis	0.649373	1.30695
Lassosum2	s.1 nl.4	Schizophrenia	0.727074	2.1332
Lassosum2	s.0.1 nl.4	Stroke	0.675554	1.21408
Lassosum2	s.0.001 nl.3	Systemic lupus erythematosus	0.735991	1.82741
Lassosum2	s.0.01 nl.4	Type 2 diabetes	0.694774	1.54842
Lassosum2	s.1 nl.11	Venous thromboembolism	0.645895	1.42739
SBayesR	c10000b4000	Asthma	0.550427	1.09663
SBayesR	c40000b2000	Bipolar disorder	0.551139	1.01197
SBayesR	c10000b2000	Breast cancer	0.8221	1.64803
SBayesR	c10000b4000	Coronary artery disease	0.78977	1.14472
SBayesR	c10000b2000	Chronic obstructive pulmonary disease	0.690692	1.0496
SBayesR	c10000b2000	Crohn's disease	0.654869	1.76497
SBayesR	c10000b2000	Gout	0.768816	1.14789
SBayesR	c40000b4000	Heart failure	0.724268	1.01035
SBayesR	c40000b2000	Lung cancer	0.712125	1.20524
SBayesR	c10000b2000	Parkinsons disease	0.756391	1.34454
SBayesR	c10000b2000	Primary open angle glaucoma	0.691886	1.13534
SBayesR	c10000b2000	Prostate cancer	0.887923	1.68856
SBayesR	c10000b2000	Psoriasis	0.668812	1.62252
SBayesR	c40000b2000	Rheumatoid arthritis	0.634812	1.08604
SBayesR	c40000b2000	Schizophrenia	0.683123	1.74324
SBayesR	c10000b2000	Stroke	0.668123	0.989051
SBayesR	c40000b4000	Systemic lupus erythematosus	0.707431	1.17959
SBayesR	c10000b2000	Type 2 diabetes	0.686858	1.43504
SBayesR	c10000b4000	Venous thromboembolism	0.608343	1.03469
SDPR	default	Asthma	0.587505	1.30033
SDPR	default	Bipolar disorder	0.628254	1.53131
SDPR	default	Breast cancer	0.831084	1.79485
SDPR	default	Coronary artery disease	0.823063	1.94191
SDPR	default	Chronic obstructive pulmonary disease	0.703191	1.3217
SDPR	default	Crohn's disease	0.680559	1.99382
SDPR	default	Gout	0.78351	1.42606
SDPR	default	Heart failure	0.731193	1.24703
SDPR	default	Lung cancer	0.718916	1.3207
SDPR	default	Parkinsons disease	0.760513	1.43015
SDPR	default	Primary open angle glaucoma	0.733523	1.6826
SDPR	default	Prostate cancer	0.898478	2.12587
SDPR	default	Psoriasis	0.659927	1.63801
SDPR	default	Rheumatoid arthritis	0.644685	1.25639
SDPR	default	Schizophrenia	0.736251	2.22555
SDPR	default	Stroke	0.671342	1.14233
SDPR	default	Systemic lupus erythematosus	0.757892	2.33826
SDPR	default	Type 2 diabetes	0.703268	1.63588
SDPR	default	Venous thromboembolism	0.647809	1.45115
SBLUP	default	Asthma	0.614732	1.47228
SBLUP	default	Bipolar disorder	0.629765	1.57301
SBLUP	default	Breast cancer	0.812225	1.51579
SBLUP	default	Coronary artery disease	0.811228	1.66747
SBLUP	default	Chronic obstructive pulmonary disease	0.705017	1.34933
SBLUP	default	Crohn's disease	0.634744	1.65564
SBLUP	default	Gout	0.789603	1.5527
SBLUP	default	Heart failure	0.732218	1.2661
SBLUP	default	Lung cancer	0.713401	1.23079
SBLUP	default	Parkinsons disease	0.754726	1.32537
SBLUP	default	Primary open angle glaucoma	0.707755	1.36834
SBLUP	default	Prostate cancer	0.880694	1.62891
SBLUP	default	Psoriasis	0.681048	1.74681
SBLUP	default	Rheumatoid arthritis	0.647824	1.3022
SBLUP	default	Schizophrenia	0.705543	2.0393
SBLUP	default	Stroke	0.672996	1.16647
SBLUP	default	Systemic lupus erythematosus	0.700918	1.76246
SBLUP	default	Type 2 diabetes	0.688822	1.48859
SBLUP	default	Venous thromboembolism	0.625023	1.26257
PRS-CS	X1e.04	Asthma	0.631744	1.58468
PRS-CS	X1e.04	Bipolar disorder	0.629347	1.54728
PRS-CS	X1e.04	Breast cancer	0.830349	1.78429
PRS-CS	X1e.04	Coronary artery disease	0.824596	1.97019
PRS-CS	X1e.04	Chronic obstructive pulmonary disease	0.705644	1.36127
PRS-CS	X1e.04	Crohn's disease	0.679277	1.97843
PRS-CS	X1e.04	Gout	0.803306	1.77208
PRS-CS	X1e.04	Heart failure	0.732226	1.26463
PRS-CS	X1e.04	Lung cancer	0.716682	1.27764
PRS-CS	X1e.05	Parkinsons disease	0.762811	1.45399
PRS-CS	X1e.05	Primary open angle glaucoma	0.736061	1.71885
PRS-CS	X1e.04	Prostate cancer	0.896479	2.05441
PRS-CS	X1e.03	Psoriasis	0.695108	1.78364
PRS-CS	X1e.04	Rheumatoid arthritis	0.651326	1.31832
PRS-CS	X1e.03	Schizophrenia	0.73483	2.22638
PRS-CS	X1e.02	Stroke	0.677203	1.23925
PRS-CS	X1e.04	Systemic lupus erythematosus	0.74672	1.91252
PRS-CS	X1e.04	Type 2 diabetes	0.701988	1.62637
PRS-CS	X1e.05	Venous thromboembolism	0.651805	1.47628
MegaPRS	Model43	Asthma	0.600365	1.39028
MegaPRS	Model30	Bipolar disorder	0.595264	1.34161
MegaPRS	Model27	Breast cancer	0.811391	1.48994
MegaPRS	Model41	Coronary artery disease	0.806973	1.58871
MegaPRS	Model40	Chronic obstructive pulmonary disease	0.69716	1.22853
MegaPRS	Model23	Crohn's disease	0.64993	1.72881
MegaPRS	Model10	Gout	0.791582	1.59257
MegaPRS	Model40	Heart failure	0.728407	1.17882
MegaPRS	Model44	Lung cancer	0.712703	1.22001
MegaPRS	Model2	Parkinsons disease	0.745328	1.13418
MegaPRS	Model43	Primary open angle glaucoma	0.714592	1.45633
MegaPRS	Model25	Prostate cancer	0.88285	1.68725
MegaPRS	Model29	Psoriasis	0.681475	1.87762
MegaPRS	Model45	Rheumatoid arthritis	0.647395	1.29074
MegaPRS	Model42	Schizophrenia	0.685313	1.73686
MegaPRS	Model42	Stroke	0.67248	1.14943
MegaPRS	Model3	Systemic lupus erythematosus	0.741006	1.86582
MegaPRS	Model41	Type 2 diabetes	0.680131	1.39459
MegaPRS	Model40	Venous thromboembolism	0.630763	1.32114

## Sheet: S5 Disease performance testing
Methods	Parameter	Disease	AUC	OR
P+T	X0.05p 0.6r2	Asthma	0.616826	1.47691
P+T	X1p 0.8r2	Bipolar disorder	0.60309	1.3919
P+T	X0.0005p 0.4r2	Breast cancer	0.816658	1.60218
P+T	X0.05p 0.6r2	Coronary artery disease	0.811816	1.77563
P+T	X0.5p 0.8r2	Chronic obstructive pulmonary disease	0.710817	1.37147
P+T	X0.05p 0.4r2	Crohn's disease	0.650804	1.76002
P+T	X0.05p 0.8r2	Gout	0.792956	1.62644
P+T	X0.5p 0.8r2	Heart failure	0.73054	1.23044
P+T	X0.5p 0.6r2	Lung cancer	0.719611	1.22272
P+T	X0.05p 0.8r2	Parkinsons disease	0.75582	1.29282
P+T	X0.05p 0.8r2	Primary open angle glaucoma	0.722539	1.53571
P+T	X0.0005p 0.2r2	Prostate cancer	0.887275	1.78763
P+T	X0.05p 0.4r2	Psoriasis	0.673639	1.64647
P+T	X0.05p 0.4r2	Rheumatoid arthritis	0.648608	1.3098
P+T	X0.5p 0.4r2	Schizophrenia	0.722131	2.08834
P+T	X1p 0.2r2	Stroke	0.671079	1.1741
P+T	X0.00000005p 0.4r2	Systemic lupus erythematosus	0.658795	1.38666
P+T	X0.05p 0.8r2	Type 2 diabetes	0.693382	1.50357
P+T	X0.00000005p 0.2r2	Venous thromboembolism	0.636999	1.33688
LDpred2	p.0.032 h2.0.7 F	Asthma	0.633003	1.57821
LDpred2	p.0.018 h2.1 F	Bipolar disorder	0.609355	1.4233
LDpred2	p.0.018 h2.0.7 T	Breast cancer	0.827746	1.77666
LDpred2	p.0.018 h2.0.7 F	Coronary artery disease	0.822172	1.99087
LDpred2	p.0.056 h2.1.4 F	Chronic obstructive pulmonary disease	0.712703	1.40163
LDpred2	p.0.01 h2.0.7 T	Crohn's disease	0.689238	2.05201
LDpred2	p.0.032 h2.0.7 T	Gout	0.803945	1.7995
LDpred2	p.0.018 h2.0.7 F	Heart failure	0.732363	1.27119
LDpred2	p.0.0056 h2.0.7 F	Lung cancer	0.725206	1.31897
LDpred2	p.0.0056 h2.0.7 T	Parkinsons disease	0.763984	1.4264
LDpred2	p.0.0056 h2.0.7 F	Primary open angle glaucoma	0.736921	1.70922
LDpred2	p.0.018 h2.0.7 T	Prostate cancer	0.898106	2.08315
LDpred2	p.0.056 h2.0.7 T	Psoriasis	0.685177	1.76626
LDpred2	p.0.1 h2.0.7 T	Rheumatoid arthritis	0.653235	1.36218
LDpred2	p.0.056 h2.0.7 F	Schizophrenia	0.751356	2.31461
LDpred2	p.0.018 h2.1.4 F	Stroke	0.674632	1.23606
LDpred2	p.0.32 h2.0.7 F	Systemic lupus erythematosus	0.628373	1.34149
LDpred2	p.0.01 h2.0.7 F	Type 2 diabetes	0.710393	1.69181
LDpred2	p.0.0056 h2.1 F	Venous thromboembolism	0.650897	1.4499
Lassosum2	s.0.01 nl.4	Asthma	0.628181	1.54713
Lassosum2	s.0.001 nl.4	Bipolar disorder	0.59265	1.34405
Lassosum2	s.0.1 nl.5	Breast cancer	0.82695	1.76106
Lassosum2	s.1 nl.5	Coronary artery disease	0.81802	1.89559
Lassosum2	s.0.01 nl.4	Chronic obstructive pulmonary disease	0.708293	1.33198
Lassosum2	s.0.01 nl.4	Crohn's disease	0.685883	1.99835
Lassosum2	s.0.001 nl.5	Gout	0.799827	1.73474
Lassosum2	s.0.1 nl.4	Heart failure	0.729252	1.20733
Lassosum2	s.0.01 nl.4	Lung cancer	0.722071	1.26281
Lassosum2	s.1 nl.3	Parkinsons disease	0.760658	1.36604
Lassosum2	s.0.01 nl.3	Primary open angle glaucoma	0.729819	1.62473
Lassosum2	s.0.001 nl.4	Prostate cancer	0.896657	2.03264
Lassosum2	s.1 nl.5	Psoriasis	0.671471	1.67905
Lassosum2	s.1 nl.10	Rheumatoid arthritis	0.649187	1.31174
Lassosum2	s.1 nl.4	Schizophrenia	0.746494	2.23006
Lassosum2	s.0.1 nl.4	Stroke	0.671532	1.18369
Lassosum2	s.0.001 nl.3	Systemic lupus erythematosus	0.685676	1.82213
Lassosum2	s.0.01 nl.4	Type 2 diabetes	0.701269	1.5938
Lassosum2	s.1 nl.11	Venous thromboembolism	0.645731	1.40616
SBayesR	c10000b4000	Asthma	0.551151	1.08222
SBayesR	c40000b2000	Bipolar disorder	0.546725	1.04072
SBayesR	c10000b2000	Breast cancer	0.81901	1.63745
SBayesR	c10000b4000	Coronary artery disease	0.786693	1.17392
SBayesR	c10000b2000	Chronic obstructive pulmonary disease	0.695913	1.07017
SBayesR	c10000b2000	Crohn's disease	0.663303	1.8063
SBayesR	c10000b2000	Gout	0.768835	1.16906
SBayesR	c40000b4000	Heart failure	0.724196	1.01339
SBayesR	c40000b2000	Lung cancer	0.717397	1.17563
SBayesR	c10000b2000	Parkinsons disease	0.755592	1.27603
SBayesR	c10000b2000	Primary open angle glaucoma	0.695434	1.13649
SBayesR	c10000b2000	Prostate cancer	0.888795	1.71545
SBayesR	c10000b2000	Psoriasis	0.654872	1.56148
SBayesR	c40000b2000	Rheumatoid arthritis	0.631926	1.08132
SBayesR	c40000b2000	Schizophrenia	0.694254	1.776
SBayesR	c10000b2000	Stroke	0.666085	1.01254
SBayesR	c40000b4000	Systemic lupus erythematosus	0.647611	1.16564
SBayesR	c10000b2000	Type 2 diabetes	0.692217	1.46536
SBayesR	c10000b4000	Venous thromboembolism	0.612101	1.03289
SDPR	default	Asthma	0.588277	1.29387
SDPR	default	Bipolar disorder	0.603585	1.38895
SDPR	default	Breast cancer	0.827866	1.77995
SDPR	default	Coronary artery disease	0.819239	1.93029
SDPR	default	Chronic obstructive pulmonary disease	0.709781	1.36087
SDPR	default	Crohn's disease	0.682005	1.99867
SDPR	default	Gout	0.782632	1.41016
SDPR	default	Heart failure	0.730981	1.24228
SDPR	default	Lung cancer	0.724689	1.31516
SDPR	default	Parkinsons disease	0.762068	1.40107
SDPR	default	Primary open angle glaucoma	0.730076	1.62336
SDPR	default	Prostate cancer	0.897902	2.08594
SDPR	default	Psoriasis	0.644566	1.55584
SDPR	default	Rheumatoid arthritis	0.642599	1.25054
SDPR	default	Schizophrenia	0.749965	2.29915
SDPR	default	Stroke	0.668994	1.13378
SDPR	default	Systemic lupus erythematosus	0.68844	1.83699
SDPR	default	Type 2 diabetes	0.706371	1.65114
SDPR	default	Venous thromboembolism	0.645671	1.41127
SBLUP	default	Asthma	0.613095	1.454
SBLUP	default	Bipolar disorder	0.607945	1.41432
SBLUP	default	Breast cancer	0.807867	1.48139
SBLUP	default	Coronary artery disease	0.80834	1.69706
SBLUP	default	Chronic obstructive pulmonary disease	0.710794	1.37474
SBLUP	default	Crohn's disease	0.640022	1.69165
SBLUP	default	Gout	0.788451	1.5364
SBLUP	default	Heart failure	0.731174	1.24819
SBLUP	default	Lung cancer	0.719387	1.21355
SBLUP	default	Parkinsons disease	0.754987	1.28049
SBLUP	default	Primary open angle glaucoma	0.707582	1.34966
SBLUP	default	Prostate cancer	0.881991	1.62763
SBLUP	default	Psoriasis	0.665474	1.66936
SBLUP	default	Rheumatoid arthritis	0.648418	1.31286
SBLUP	default	Schizophrenia	0.712175	2.0521
SBLUP	default	Stroke	0.67026	1.15802
SBLUP	default	Systemic lupus erythematosus	0.660742	1.49525
SBLUP	default	Type 2 diabetes	0.692161	1.49227
SBLUP	default	Venous thromboembolism	0.625901	1.22989
PRS-CS	X1e.04	Asthma	0.633345	1.5816
PRS-CS	X1e.04	Bipolar disorder	0.605562	1.40684
PRS-CS	X1e.04	Breast cancer	0.826803	1.7659
PRS-CS	X1e.04	Coronary artery disease	0.821363	1.96769
PRS-CS	X1e.04	Chronic obstructive pulmonary disease	0.711944	1.39546
PRS-CS	X1e.04	Crohn's disease	0.679884	1.99689
PRS-CS	X1e.04	Gout	0.801075	1.74745
PRS-CS	X1e.04	Heart failure	0.731584	1.25543
PRS-CS	X1e.04	Lung cancer	0.721296	1.24661
PRS-CS	X1e.05	Parkinsons disease	0.761705	1.39385
PRS-CS	X1e.05	Primary open angle glaucoma	0.732063	1.6497
PRS-CS	X1e.04	Prostate cancer	0.89646	2.03494
PRS-CS	X1e.03	Psoriasis	0.677648	1.69706
PRS-CS	X1e.04	Rheumatoid arthritis	0.651614	1.32783
PRS-CS	X1e.03	Schizophrenia	0.737851	2.2074
PRS-CS	X1e.02	Stroke	0.672273	1.19406
PRS-CS	X1e.04	Systemic lupus erythematosus	0.677035	1.63017
PRS-CS	X1e.04	Type 2 diabetes	0.70713	1.65546
PRS-CS	X1e.05	Venous thromboembolism	0.648522	1.43141
MegaPRS	Model43	Asthma	0.599668	1.371
MegaPRS	Model30	Bipolar disorder	0.577774	1.25616
MegaPRS	Model27	Breast cancer	0.808166	1.47479
MegaPRS	Model41	Coronary artery disease	0.803973	1.62495
MegaPRS	Model40	Chronic obstructive pulmonary disease	0.702298	1.23919
MegaPRS	Model23	Crohn's disease	0.636956	1.62429
MegaPRS	Model10	Gout	0.789731	1.56476
MegaPRS	Model40	Heart failure	0.727563	1.16329
MegaPRS	Model44	Lung cancer	0.719736	1.21654
MegaPRS	Model2	Parkinsons disease	0.748349	1.11417
MegaPRS	Model43	Primary open angle glaucoma	0.713999	1.43286
MegaPRS	Model25	Prostate cancer	0.884379	1.70062
MegaPRS	Model29	Psoriasis	0.670879	1.79637
MegaPRS	Model45	Rheumatoid arthritis	0.645923	1.28196
MegaPRS	Model42	Schizophrenia	0.686062	1.67405
MegaPRS	Model42	Stroke	0.669275	1.14209
MegaPRS	Model3	Systemic lupus erythematosus	0.654956	1.58635
MegaPRS	Model41	Type 2 diabetes	0.683318	1.40547
MegaPRS	Model40	Venous thromboembolism	0.62902	1.26959

## Sheet: S6 Best performance (disease) 
Methods	Parameter	Disease	AUC	OR	OR (95%CI)
PRS-CS	X1e.04	Asthma	0.633345	1.5816	1.582 (1.561-1.603)
LDpred2	p.0.018 h2.1 F	Bipolar disorder	0.609355	1.4233	1.423 (1.330-1.523)
SDPR	default	Breast cancer	0.827866	1.77995	1.780 (1.739-1.822)
LDpred2	p.0.018 h2.0.7 F	Coronary artery disease	0.822172	1.99087	1.991 (1.936-2.047)
LDpred2	p.0.056 h2.1.4 F	Chronic obstructive pulmonary disease	0.712703	1.40163	1.402 (1.374-1.430)
LDpred2	p.0.01 h2.0.7 T	Crohn's disease	0.689238	2.05201	2.052 (1.934-2.177)
LDpred2	p.0.032 h2.0.7 T	Gout	0.803945	1.7995	1.800 (1.751-1.849)
LDpred2	p.0.018 h2.0.7 F	Heart failure	0.732363	1.27119	1.271 (1.241-1.302)
LDpred2	p.0.0056 h2.0.7 F	Lung cancer	0.725206	1.31897	1.319 (1.266-1.374)
LDpred2	p.0.0056 h2.0.7 T	Parkinsons disease	0.763984	1.4264	1.426 (1.356-1.501)
LDpred2	p.0.0056 h2.0.7 F	Primary open angle glaucoma	0.736921	1.70922	1.709 (1.660-1.760)
SDPR	default	Prostate cancer	0.897902	2.08594	2.086 (2.026-2.147)
MegaPRS	Model29	Psoriasis	0.670879	1.79637	1.796 (1.744-1.851)
LDpred2	p.0.1 h2.0.7 T	Rheumatoid arthritis	0.653235	1.36218	1.362 (1.323-1.402)
LDpred2	p.0.056 h2.0.7 F	Schizophrenia	0.751356	2.31461	2.315 (2.096-2.556)
LDpred2	p.0.018 h2.1.4 F	Stroke	0.674632	1.23606	1.236 (1.187-1.288)
SDPR	default	Systemic lupus erythematosus	0.68844	1.83699	1.837 (1.415-2.384)
LDpred2	p.0.01 h2.0.7 F	Type 2 diabetes	0.710393	1.69181	1.692 (1.662-1.722)
LDpred2	p.0.0056 h2.1 F	Venous thromboembolism	0.650897	1.4499	1.450 (1.422-1.478)

## Sheet: S7 Ensemble method in diseases
Methods	Disease	AUC	OR	OR (95%CI)
Ensemble method	Asthma	0.636415	1.60226	1.602 (1.581-1.624)
Ensemble method	Bipolar disorder	0.610491	1.43098	1.431 (1.337-1.532)
Ensemble method	Breast cancer	0.829589	1.80596	1.806 (1.764-1.849)
Ensemble method	Coronary artery disease	0.822901	2.01133	2.011 (1.956-2.068)
Ensemble method	Chronic obstructive pulmonary disease	0.713394	1.4145	1.414 (1.387-1.443)
Ensemble method	Crohn's disease	0.690914	2.06838	2.068 (1.949-2.195)
Ensemble method	Gout	0.804162	1.80773	1.808 (1.759-1.858)
Ensemble method	Heart failure	0.732594	1.27516	1.275 (1.245-1.306)
Ensemble method	Lung cancer	0.726617	1.34519	1.345 (1.291-1.402)
Ensemble method	Parkinsons disease	0.764769	1.4437	1.444 (1.372-1.519)
Ensemble method	Primary open angle glaucoma	0.737368	1.71677	1.717 (1.667-1.768)
Ensemble method	Prostate cancer	0.899587	2.13725	2.137 (2.076-2.200)
Ensemble method	Psoriasis	0.695076	1.89487	1.895 (1.844-1.947)
Ensemble method	Rheumatoid arthritis	0.656601	1.38723	1.387 (1.349-1.427)
Ensemble method	Schizophrenia	0.755326	2.36274	2.363 (2.139-2.610)
Ensemble method	Stroke	0.674609	1.23751	1.238 (1.188-1.289)
Ensemble method	Systemic lupus erythematosus	0.689585	1.97726	1.977 (1.512-2.586)
Ensemble method	Type 2 diabetes	0.710851	1.69753	1.698 (1.668-1.728)
Ensemble method	Venous thromboembolism	0.651488	1.45594	1.456 (1.428-1.484)

## Sheet: S8 QT performance training
Methods	Parameter	QT	Pearson R2	Incremental R2	R2
P+T	X0.000005p 0.2r2	Apolipoprotein A1	0.0469846	0.0397425	0.441007
P+T	X0.00000005p 0.2r2	Apolipoprotein B	0.0704346	0.070195	0.271581
P+T	X0.05p 0.6r2	Body mass index	0.0549078	0.0543978	0.257661
P+T	X0.0005p 0.4r2	Calcium	0.0136478	0.0135351	0.151245
P+T	X0.000005p 0.4r2	Docosahexaenoic acid	0.037771	0.0346501	0.345537
P+T	X0.0005p 0.8r2	Estimated glomerular filtration rate creatinine based	0.00449367	0.00350404	0.473352
P+T	X0.0005p 0.2r2	Glycated hemoglobin (HbA1c)	0.0270804	0.0259116	0.266191
P+T	X0.05p 0.2r2	HDL	0.137863	0.11434	0.534754
P+T	X0.05p 0.4r2	Height	0.217516	0.102552	0.797601
P+T	X0.05p 0.2r2	LDL	0.116993	0.113485	0.379075
P+T	X0.05p 0.4r2	Remnant cholesterol	0.053089	0.0521409	0.26529
P+T	X0.000005p 0.4r2	Omega3 fatty acids	0.0571522	0.0531722	0.352905
P+T	X0.000005p 0.2r2	Omega6 fatty acids	0.0314039	0.0300537	0.27214
P+T	X0.000005p 0.2r2	Phosphoglycerides	0.0337328	0.0302176	0.367383
P+T	X0.00000005p 0.2r2	Sphingomyelins	0.0293328	0.025727	0.386362
P+T	X0.05p 0.2r2	Total Cholesterol	0.107556	0.103063	0.380833
P+T	X0.5p 0.2r2	Triglycerides	0.0792918	0.0750492	0.359785
LDpred2	p.0.001 h2.0.7 F	Apolipoprotein A1	0.0572746	0.0484464	0.450767
LDpred2	p.0.0018 h2.0.7 T	Apolipoprotein B	0.0894629	0.0891586	0.304499
LDpred2	p.0.056 h2.0.7 T	Body mass index	0.072515	0.0718414	0.289539
LDpred2	p.0.0018 h2.1 F	Calcium	0.0212887	0.0211128	0.174507
LDpred2	p.0.001 h2.0.7 T	Docosahexaenoic acid	0.0381849	0.0350298	0.346086
LDpred2	p.0.0018 h2.0.7 F	Estimated glomerular filtration rate creatinine based	0.00869396	0.00677931	0.476799
LDpred2	p.0.018 h2.0.7 T	Glycated hemoglobin (HbA1c)	0.041738	0.0399365	0.291346
LDpred2	p.0.32 h2.0.7 T	HDL	0.180864	0.150005	0.567121
LDpred2	p.0.1 h2.0.7 T	Height	0.279012	0.131545	0.815574
LDpred2	p.0.1 h2.0.7 T	LDL	0.162253	0.157387	0.433128
LDpred2	p.0.1 h2.0.7 T	Remnant cholesterol	0.0738097	0.0724915	0.301213
LDpred2	p.0.0018 h2.0.7 T	Omega3 fatty acids	0.0528029	0.0491257	0.347125
LDpred2	p.1e.04 h2.1.4 T	Omega6 fatty acids	0.0378079	0.0361823	0.283176
LDpred2	p.0.00032 h2.1.4 T	Phosphoglycerides	0.0415346	0.0372065	0.376775
LDpred2	p.0.00018 h2.0.7 T	Sphingomyelins	0.0362542	0.0317976	0.39414
LDpred2	p.0.18 h2.0.7 T	Total Cholesterol	0.1513	0.14498	0.432378
LDpred2	p.0.32 h2.0.7 T	Triglycerides	0.120735	0.114275	0.410696
Lassosum2	s.0.01 nl.3	Apolipoprotein A1	0.0519434	0.0439369	0.445737
Lassosum2	s.1 nl.18	Apolipoprotein B	0.09446	0.0941387	0.31257
Lassosum2	s.0.1 nl.5	Body mass index	0.0635659	0.0629754	0.273801
Lassosum2	s.0.1 nl.11	Calcium	0.0178441	0.0176966	0.164428
Lassosum2	s.0.1 nl.2	Docosahexaenoic acid	0.0428335	0.0392943	0.352193
Lassosum2	s.0.1 nl.2	Estimated glomerular filtration rate creatinine based	0.00551167	0.00429785	0.47419
Lassosum2	s.1 nl.5	Glycated hemoglobin (HbA1c)	0.0374147	0.0357998	0.284158
Lassosum2	s.0.1 nl.8	HDL	0.168665	0.139887	0.558129
Lassosum2	s.0.1 nl.5	Height	0.276034	0.130141	0.814713
Lassosum2	s.0.001 nl.7	LDL	0.159088	0.154317	0.429569
Lassosum2	s.0.001 nl.6	Remnant cholesterol	0.0763607	0.0749969	0.305343
Lassosum2	s.0.01 nl.2	Omega3 fatty acids	0.0603792	0.0561745	0.357133
Lassosum2	s.0.1 nl.2	Omega6 fatty acids	0.0344713	0.0329892	0.277481
Lassosum2	s.0.001 nl.2	Phosphoglycerides	0.0390501	0.0349809	0.37381
Lassosum2	s.1 nl.2	Sphingomyelins	0.0314958	0.0276241	0.388809
Lassosum2	s.1 nl.7	Total Cholesterol	0.154972	0.148499	0.436428
Lassosum2	s.0.001 nl.7	Triglycerides	0.10807	0.102287	0.395833
SBayesR	c20000b2000	Apolipoprotein A1	0.0444119	0.0375663	0.438533
SBayesR	c20000b2000	Apolipoprotein B	0.0729445	0.0726964	0.276148
SBayesR	c10000b2000	Body mass index	0.019803	0.0196191	0.177794
SBayesR	c20000b2000	Calcium	0.0138172	0.013703	0.151799
SBayesR	c20000b2000	Docosahexaenoic acid	0.0429385	0.0393907	0.35233
SBayesR	c40000b2000	Estimated glomerular filtration rate creatinine based	0.00505012	0.00393795	0.47381
SBayesR	c10000b2000	Glycated hemoglobin (HbA1c)	0.0320385	0.0306557	0.274958
SBayesR	c10000b2000	HDL	0.131349	0.108938	0.529678
SBayesR	c40000b4000	Height	0.00095798	0.000451656	0.730799
SBayesR	c10000b2000	LDL	0.137207	0.133093	0.404111
SBayesR	c10000b4000	Remnant cholesterol	0.0655468	0.0643761	0.287426
SBayesR	c10000b2000	Omega3 fatty acids	0.0517722	0.0481668	0.345741
SBayesR	c40000b2000	Omega6 fatty acids	0.0239021	0.0228744	0.258613
SBayesR	c10000b2000	Phosphoglycerides	0.0275951	0.0247196	0.359823
SBayesR	c10000b2000	Sphingomyelins	0.0209649	0.0183877	0.376744
SBayesR	c10000b2000	Total Cholesterol	0.122559	0.11744	0.399262
SBayesR	c10000b2000	Triglycerides	0.0608856	0.0576279	0.3347
SDPR	default	Apolipoprotein A1	0.0391048	0.0330772	0.433384
SDPR	default	Apolipoprotein B	0.0509515	0.0507781	0.233108
SDPR	default	Body mass index	0.0725257	0.071852	0.289558
SDPR	default	Calcium	0.0166058	0.0164686	0.160651
SDPR	default	Docosahexaenoic acid	0.0183157	0.0168024	0.318666
SDPR	default	Estimated glomerular filtration rate creatinine based	0.00510346	0.00397954	0.473854
SDPR	default	Glycated hemoglobin (HbA1c)	0.0370862	0.0354855	0.283604
SDPR	default	HDL	0.152434	0.126425	0.545936
SDPR	default	Height	0.261684	0.123375	0.81055
SDPR	default	LDL	0.15944	0.154659	0.429967
SDPR	default	Remnant cholesterol	0.073047	0.0717424	0.299967
SDPR	default	Omega3 fatty acids	0.0159633	0.0148517	0.293635
SDPR	default	Omega6 fatty acids	0.0213215	0.0204048	0.253793
SDPR	default	Phosphoglycerides	0.0215494	0.0193038	0.352217
SDPR	default	Sphingomyelins	0.0201228	0.0176491	0.375763
SDPR	default	Total Cholesterol	0.148687	0.142476	0.429473
SDPR	default	Triglycerides	0.0892753	0.0844986	0.372686
SBLUP	default	Apolipoprotein A1	0.00726755	0.00614734	0.401113
SBLUP	default	Apolipoprotein B	0.00507055	0.0050533	0.0928146
SBLUP	default	Body mass index	0.0377449	0.0373943	0.222229
SBLUP	default	Calcium	0.0054807	0.00543542	0.121554
SBLUP	default	Docosahexaenoic acid	0.00341106	0.00312922	0.296437
SBLUP	default	Estimated glomerular filtration rate creatinine based	0.0047106	0.00367319	0.473531
SBLUP	default	Glycated hemoglobin (HbA1c)	0.0201547	0.0192848	0.253438
SBLUP	default	HDL	0.0997149	0.0827015	0.504304
SBLUP	default	Height	0.209298	0.0986772	0.795168
SBLUP	default	LDL	0.0975923	0.0946657	0.353381
SBLUP	default	Remnant cholesterol	0.0409559	0.0402244	0.241789
SBLUP	default	Omega3 fatty acids	0.00271843	0.00252912	0.271843
SBLUP	default	Omega6 fatty acids	0.00454312	0.00434779	0.219895
SBLUP	default	Phosphoglycerides	0.00297563	0.00266556	0.327747
SBLUP	default	Sphingomyelins	0.00121955	0.00106964	0.353013
SBLUP	default	Total Cholesterol	0.0945186	0.0905707	0.364062
SBLUP	default	Triglycerides	0.0854617	0.080889	0.367812
PRS-CS	X1e.06	Apolipoprotein A1	0.0489571	0.0414109	0.442894
PRS-CS	X1e.06	Apolipoprotein B	0.0766373	0.0763766	0.282733
PRS-CS	X1e.03	Body mass index	0.0715129	0.0708486	0.28782
PRS-CS	X1e.05	Calcium	0.0175182	0.0173735	0.163443
PRS-CS	X1e.06	Docosahexaenoic acid	0.0285138	0.0261578	0.333021
PRS-CS	X1e.05	Estimated glomerular filtration rate creatinine based	0.00665382	0.00518847	0.475128
PRS-CS	X1e.04	Glycated hemoglobin (HbA1c)	0.0433728	0.0415008	0.294018
PRS-CS	X1e.03	HDL	0.178865	0.148347	0.565657
PRS-CS	X1e.03	Height	0.284367	0.13407	0.81712
PRS-CS	X1e.03	LDL	0.157854	0.15312	0.428174
PRS-CS	X1e.04	Remnant cholesterol	0.0750816	0.0737407	0.303279
PRS-CS	X1e.06	Omega3 fatty acids	0.0460442	0.0428378	0.337946
PRS-CS	X1e.06	Omega6 fatty acids	0.0306428	0.0293254	0.270798
PRS-CS	X1e.06	Phosphoglycerides	0.0301019	0.0269651	0.36293
PRS-CS	X1e.06	Sphingomyelins	0.0207213	0.0181741	0.376461
PRS-CS	X1e.03	Total Cholesterol	0.156174	0.149651	0.437746
PRS-CS	X1e.03	Triglycerides	0.118447	0.112109	0.408051
MegaPRS	Model44	Apolipoprotein A1	0.0231063	0.0195448	0.41748
MegaPRS	Model43	Apolipoprotein B	0.0723943	0.072148	0.275153
MegaPRS	Model41	Body mass index	0.0354685	0.035139	0.217096
MegaPRS	Model43	Calcium	0.011706	0.0116093	0.144739
MegaPRS	Model45	Docosahexaenoic acid	0.010673	0.00979113	0.307468
MegaPRS	Model43	Estimated glomerular filtration rate creatinine based	0.00384823	0.00300075	0.47282
MegaPRS	Model43	Glycated hemoglobin (HbA1c)	0.0221495	0.0211935	0.257176
MegaPRS	Model1	HDL	0.0898055	0.0744828	0.496089
MegaPRS	Model41	Height	0.136555	0.0643811	0.773303
MegaPRS	Model13	LDL	0.0996529	0.0966644	0.356198
MegaPRS	Model36	Remnant cholesterol	0.0475432	0.0466941	0.254817
MegaPRS	Model45	Omega3 fatty acids	0.0124729	0.0116043	0.288052
MegaPRS	Model45	Omega6 fatty acids	0.0179896	0.0172161	0.247431
MegaPRS	Model43	Phosphoglycerides	0.0212358	0.0190229	0.351818
MegaPRS	Model43	Sphingomyelins	0.0194185	0.0170315	0.37494
MegaPRS	Model12	Total Cholesterol	0.0900074	0.0862479	0.358076
MegaPRS	Model36	Triglycerides	0.0570444	0.0539922	0.329224

## Sheet: S9 QT performance testing
Methods	Parameter	Quantitative traits	Pearson R2	Incremental R2	R2
P+T	X0.000005p 0.2r2	Apolipoprotein A1	0.0496537	0.0421436	0.440428
P+T	X0.00000005p 0.2r2	Apolipoprotein B	0.0731813	0.0729397	0.276437
P+T	X0.05p 0.6r2	Body mass index	0.0548315	0.0543546	0.256378
P+T	X0.0005p 0.4r2	Calcium	0.01513	0.0150022	0.15919
P+T	X0.000005p 0.4r2	Docosahexaenoic acid	0.036168	0.0330554	0.348704
P+T	X0.0005p 0.8r2	Estimated glomerular filtration rate creatinine based	0.0047546	0.00362061	0.492608
P+T	X0.0005p 0.2r2	Glycated hemoglobin (HbA1c)	0.0296693	0.0283179	0.274118
P+T	X0.05p 0.2r2	HDL	0.144043	0.119316	0.540173
P+T	X0.05p 0.4r2	Height	0.216516	0.102141	0.79721
P+T	X0.05p 0.2r2	LDL	0.116298	0.112982	0.376413
P+T	X0.05p 0.4r2	Remnant cholesterol	0.0577992	0.0568761	0.271202
P+T	X0.000005p 0.4r2	Omega3 fatty acids	0.0552909	0.0516699	0.344482
P+T	X0.000005p 0.2r2	Omega6 fatty acids	0.0339385	0.0325874	0.271047
P+T	X0.000005p 0.2r2	Phosphoglycerides	0.0361455	0.0324224	0.368777
P+T	X0.00000005p 0.2r2	Sphingomyelins	0.0296935	0.0259619	0.390104
P+T	X0.05p 0.2r2	Total Cholesterol	0.105989	0.101382	0.3807
P+T	X0.5p 0.2r2	Triglycerides	0.0768315	0.072754	0.356119
LDpred2	p.0.001 h2.0.7 F	Apolipoprotein A1	0.0591611	0.050213	0.449495
LDpred2	p.0.0018 h2.0.7 T	Apolipoprotein B	0.0925093	0.0922039	0.309324
LDpred2	p.0.056 h2.0.7 T	Body mass index	0.072454	0.0718238	0.288442
LDpred2	p.0.0018 h2.1 F	Calcium	0.0224109	0.0222216	0.180447
LDpred2	p.0.001 h2.0.7 T	Docosahexaenoic acid	0.0336767	0.0307785	0.345423
LDpred2	p.0.0018 h2.0.7 F	Estimated glomerular filtration rate creatinine based	0.00987597	0.00752051	0.49655
LDpred2	p.0.018 h2.0.7 T	Glycated hemoglobin (HbA1c)	0.0459554	0.0438622	0.30114
LDpred2	p.0.32 h2.0.7 T	HDL	0.186257	0.154284	0.571624
LDpred2	p.0.1 h2.0.7 T	Height	0.279486	0.131848	0.815629
LDpred2	p.0.1 h2.0.7 T	LDL	0.16064	0.156059	0.429842
LDpred2	p.0.1 h2.0.7 T	Remnant cholesterol	0.0810076	0.0797139	0.310465
LDpred2	p.0.0018 h2.0.7 T	Omega3 fatty acids	0.0545188	0.0509484	0.343434
LDpred2	p.1e.04 h2.1.4 T	Omega6 fatty acids	0.0394251	0.0378555	0.280597
LDpred2	p.0.00032 h2.1.4 T	Phosphoglycerides	0.0450269	0.0403889	0.379425
LDpred2	p.0.00018 h2.0.7 T	Sphingomyelins	0.0358534	0.0313477	0.396947
LDpred2	p.0.18 h2.0.7 T	Total Cholesterol	0.150397	0.14386	0.43291
LDpred2	p.0.32 h2.0.7 T	Triglycerides	0.118953	0.11264	0.408297
Lassosum2	s.0.01 nl.3	Apolipoprotein A1	0.0538249	0.0456839	0.444429
Lassosum2	s.1 nl.18	Apolipoprotein B	0.0973662	0.0970447	0.317052
Lassosum2	s.0.1 nl.5	Body mass index	0.0633502	0.0627992	0.27235
Lassosum2	s.0.1 nl.11	Calcium	0.0187347	0.0185765	0.170047
Lassosum2	s.0.1 nl.2	Docosahexaenoic acid	0.0407167	0.0372126	0.354614
Lassosum2	s.0.1 nl.2	Estimated glomerular filtration rate creatinine based	0.00594003	0.00452331	0.493523
Lassosum2	s.1 nl.5	Glycated hemoglobin (HbA1c)	0.0420423	0.0401273	0.294873
Lassosum2	s.0.1 nl.8	HDL	0.172182	0.142625	0.561334
Lassosum2	s.0.1 nl.5	Height	0.276413	0.130398	0.81474
Lassosum2	s.0.001 nl.7	LDL	0.157089	0.15261	0.42581
Lassosum2	s.0.001 nl.6	Remnant cholesterol	0.0837447	0.0824073	0.314773
Lassosum2	s.0.01 nl.2	Omega3 fatty acids	0.0598076	0.0558908	0.350555
Lassosum2	s.0.1 nl.2	Omega6 fatty acids	0.0373458	0.035859	0.277016
Lassosum2	s.0.001 nl.2	Phosphoglycerides	0.042307	0.0379492	0.376196
Lassosum2	s.1 nl.2	Sphingomyelins	0.0302671	0.0264634	0.390746
Lassosum2	s.1 nl.7	Total Cholesterol	0.154762	0.148035	0.437705
Lassosum2	s.0.001 nl.7	Triglycerides	0.105468	0.0998705	0.392348
SBayesR	c20000b2000	Apolipoprotein A1	0.0467833	0.0397073	0.437653
SBayesR	c20000b2000	Apolipoprotein B	0.0742572	0.074012	0.278369
SBayesR	c10000b2000	Body mass index	0.0194827	0.0193132	0.175181
SBayesR	c20000b2000	Calcium	0.013731	0.0136151	0.154772
SBayesR	c20000b2000	Docosahexaenoic acid	0.0415983	0.0380183	0.355749
SBayesR	c40000b2000	Estimated glomerular filtration rate creatinine based	0.00601761	0.00458238	0.493583
SBayesR	c10000b2000	Glycated hemoglobin (HbA1c)	0.0352677	0.0336613	0.283697
SBayesR	c10000b2000	HDL	0.137851	0.114187	0.535405
SBayesR	c40000b4000	Height	0.000609847	0.000287696	0.730541
SBayesR	c10000b2000	LDL	0.136789	0.132888	0.401986
SBayesR	c10000b4000	Remnant cholesterol	0.0705832	0.069456	0.29348
SBayesR	c10000b2000	Omega3 fatty acids	0.0497929	0.0465319	0.336942
SBayesR	c40000b2000	Omega6 fatty acids	0.0257142	0.0246905	0.256065
SBayesR	c10000b2000	Phosphoglycerides	0.0317761	0.028503	0.363425
SBayesR	c10000b2000	Sphingomyelins	0.0211094	0.0184565	0.380363
SBayesR	c10000b2000	Total Cholesterol	0.124069	0.118676	0.402774
SBayesR	c10000b2000	Triglycerides	0.0610291	0.0577903	0.33445
SDPR	default	Apolipoprotein A1	0.0411267	0.0349063	0.432133
SDPR	default	Apolipoprotein B	0.0527374	0.0525633	0.236729
SDPR	default	Body mass index	0.072647	0.0720152	0.288774
SDPR	default	Calcium	0.0172813	0.0171353	0.165755
SDPR	default	Docosahexaenoic acid	0.0157418	0.0143871	0.320821
SDPR	default	Estimated glomerular filtration rate creatinine based	0.00559928	0.00426383	0.49326
SDPR	default	Glycated hemoglobin (HbA1c)	0.040368	0.0385293	0.292151
SDPR	default	HDL	0.157103	0.130134	0.550096
SDPR	default	Height	0.260992	0.123123	0.810263
SDPR	default	LDL	0.159437	0.15489	0.42848
SDPR	default	Remnant cholesterol	0.0782296	0.0769803	0.306031
SDPR	default	Omega3 fatty acids	0.0188082	0.0175764	0.290817
SDPR	default	Omega6 fatty acids	0.0207378	0.0199122	0.246559
SDPR	default	Phosphoglycerides	0.026427	0.0237049	0.356762
SDPR	default	Sphingomyelins	0.02157	0.0188592	0.380892
SDPR	default	Total Cholesterol	0.147667	0.141248	0.429883
SDPR	default	Triglycerides	0.0893688	0.0846259	0.372414
SBLUP	default	Apolipoprotein A1	0.0077125	0.00654598	0.397969
SBLUP	default	Apolipoprotein B	0.00593662	0.00591703	0.0969251
SBLUP	default	Body mass index	0.0378973	0.0375676	0.221231
SBLUP	default	Calcium	0.00633974	0.00628619	0.12894
SBLUP	default	Docosahexaenoic acid	0.00205056	0.00187409	0.300687
SBLUP	default	Estimated glomerular filtration rate creatinine based	0.00543497	0.00413871	0.493133
SBLUP	default	Glycated hemoglobin (HbA1c)	0.0221459	0.0211372	0.260692
SBLUP	default	HDL	0.101023	0.0836808	0.506114
SBLUP	default	Height	0.208077	0.0981608	0.794709
SBLUP	default	LDL	0.0960433	0.0933047	0.349298
SBLUP	default	Remnant cholesterol	0.043634	0.0429371	0.244155
SBLUP	default	Omega3 fatty acids	0.0043897	0.00410222	0.266647
SBLUP	default	Omega6 fatty acids	0.00419969	0.00403249	0.211923
SBLUP	default	Phosphoglycerides	0.00432631	0.00388068	0.327803
SBLUP	default	Sphingomyelins	0.00149802	0.00130976	0.357112
SBLUP	default	Total Cholesterol	0.0936995	0.0896266	0.364935
SBLUP	default	Triglycerides	0.0835736	0.0791383	0.364972
PRS-CS	X1e.06	Apolipoprotein A1	0.0505426	0.042898	0.441283
PRS-CS	X1e.06	Apolipoprotein B	0.0800786	0.0798143	0.288603
PRS-CS	X1e.03	Body mass index	0.0721864	0.0715585	0.287982
PRS-CS	X1e.05	Calcium	0.0182354	0.0180814	0.168585
PRS-CS	X1e.06	Docosahexaenoic acid	0.0251398	0.0229763	0.333939
PRS-CS	X1e.05	Estimated glomerular filtration rate creatinine based	0.00749285	0.00570577	0.49472
PRS-CS	X1e.04	Glycated hemoglobin (HbA1c)	0.0475878	0.0454203	0.303716
PRS-CS	X1e.03	HDL	0.184572	0.152888	0.570402
PRS-CS	X1e.03	Height	0.284574	0.134248	0.817099
PRS-CS	X1e.03	LDL	0.156774	0.152303	0.42545
PRS-CS	X1e.04	Remnant cholesterol	0.0816516	0.0803477	0.311484
PRS-CS	X1e.06	Omega3 fatty acids	0.0483638	0.0451965	0.334955
PRS-CS	X1e.06	Omega6 fatty acids	0.0337027	0.0323609	0.270629
PRS-CS	X1e.06	Phosphoglycerides	0.0330617	0.0296562	0.365008
PRS-CS	X1e.06	Sphingomyelins	0.0199695	0.0174599	0.379051
PRS-CS	X1e.03	Total Cholesterol	0.1556	0.148837	0.43862
PRS-CS	X1e.03	Triglycerides	0.117729	0.111481	0.406875
MegaPRS	Model44	Apolipoprotein A1	0.0241898	0.0205311	0.415168
MegaPRS	Model43	Apolipoprotein B	0.0757904	0.0755402	0.281101
MegaPRS	Model41	Body mass index	0.0345919	0.034291	0.213697
MegaPRS	Model43	Calcium	0.0127553	0.0126475	0.151614
MegaPRS	Model45	Docosahexaenoic acid	0.00793153	0.00724894	0.309496
MegaPRS	Model43	Estimated glomerular filtration rate creatinine based	0.0044313	0.00337441	0.492358
MegaPRS	Model43	Glycated hemoglobin (HbA1c)	0.0238702	0.022783	0.263829
MegaPRS	Model1	HDL	0.0914791	0.0757756	0.498243
MegaPRS	Model41	Height	0.133526	0.062991	0.772265
MegaPRS	Model13	LDL	0.0984673	0.0956596	0.352653
MegaPRS	Model36	Remnant cholesterol	0.0505494	0.0497421	0.257714
MegaPRS	Model45	Omega3 fatty acids	0.0165701	0.0154849	0.287199
MegaPRS	Model45	Omega6 fatty acids	0.0197786	0.0189912	0.244684
MegaPRS	Model43	Phosphoglycerides	0.0225033	0.0201854	0.351795
MegaPRS	Model43	Sphingomyelins	0.019346	0.0169148	0.378331
MegaPRS	Model12	Total Cholesterol	0.0905932	0.0866553	0.360841
MegaPRS	Model36	Triglycerides	0.055518	0.0525716	0.326555

[truncated: 10 more sheets: S10 Best performance (QT), S11 Ensemble method in QT, S12 Disease risk stratification, S13 LD  generating time, S14 LD sample sizes (disease), S15 LD sample sizes (QT), S16 Multi-ancestry (disease), S17 Multi-ancestry (QT), S18 Computational cost, S19 Computational statistics]
